# Supplementary material for: Selection of a marker gene to construct a reference library for wetland plants, and the application of metabarcoding to analyze the diet of wintering herbivorous waterbirds
Source: PeerJ. 2016 Aug 17;4:e2345. doi: 10.7717/peerj.2345 (PMC4991844; doi:10.7717/peerj.2345)
Supplement: Table S1 [file peerj-04-2345-s001.xlsx]

## Sheet: Sheet1
S1 Table. Divergence of dominant genera/families with representative sequences retrieved from GenBank. The resolvable power indicated the percentage of identified species.
Taxa	Gene	Divergence range	Mean divergence	Resolvable power	No. of Sequences	No. of Species
Artemisia	rbcL	0.0-3.6%	0.001	0.35	57	23
	matK	0.0-0.9%	0	0.16	58	25
	trnH-psbA	0.0-9.6%	0.011	0.27	193	122
	trnL	0.0-4.3%	0.003	0	150	120
	atpF-atpH	－	－	－	1	1
	psbK-psbI	－	－	－	－	－
	rpoB	0.0-1.7%	0.009	0.2	5	5
	rpoC1	0.0-1.5%	0.004	0.2	11	10
Carex	rbcL	0.0-1.9%	0.0029	0.27	345	123
	matK	0.0-5.4%	0.024	0.77	174	105
	trnH-psbA	0.0-4.8%	0.017	0.43	51	21
	trnL	0.0-7.7%	0.02	0.19	113	79
	atpF-atpH	0.0-7.4%	0.028	0.58	80	23
	psbK-psbI	0.0-5.6%	0.019	0.85	77	13
	rpoB	0.0-2.6%	0.008	0.29	148	56
	rpoC1	0.0-3.1%	0.009	0.3	160	60
Echinochloa	rbcL	0.0-3.0%	0.005	0.29	22	7
	matK	0.0-2.4%	0.002	0	67	4
	trnH-psbA	0.0-0.7%	0.005	－	3	3
	trnL	0.0-1.5%	0.008	0	39	9
	atpF-atpH	0.0-0.0%	0	0	5	3
	psbK-psbI	0.0-0.0%	0	－	3	2
	rpoB	－	－	－	－	－
	rpoC1	0.0-0.0%	0	－	2	2
Elymus	rbcL	0.0-0.6%	0.0006	0.29	19	17
	matK	0.0-1.2%	0.002	0.5	26	15
	trnH-psbA	0.0-1.7%	0.004	0	28	13
	trnL	0.0-2.3%	0.001	0	44	15
	atpF-atpH	0.0-0.0%	0	0.2	7	5
	psbK-psbI	0.0-0.0%	0	0.25	4	4
	rpoB	－	－	－	1	1
	rpoC1	－	－	－	1	1
Eleocharis	rbcL	0.0-3.5%	0.0048	0.55	38	21
	matK	－	－	－	－	－
	trnH-psbA	－	－	－	－	－
	trnL	0.0-8.5%	0.032	1	7	5
	atpF-atpH	－	－	－	－	－
	psbK-psbI	－	－	－	－	－
	rpoB	－	－	－	－	－
	rpoC1	－	－	－	－	－
Juncus	rbcL	0.0-3.0%	0.004	0.48	136	29
	matK	0.0-10.4%	0.047	0.61	38	18
	trnH-psbA	4.2-13.5%	0.096	－	3	3
	trnL	0.0-10.6%	0.041	0.19	32	22
	atpF-atpH	0.5-0.5%	0.004	－	3	2
	psbK-psbI	－	－	－	1	1
	rpoB	－	－	－	1	1
	rpoC1	－	－	－	1	1
Polygonum	rbcL	0.0-11.2%	0.012	0.44	123	45
	matK	0.0-14.1%	0.079	0.55	35	10
	trnH-psbA	0.0-44.1%	0.254	0.78	27	9
	trnL	0.0-18.1%	0.063	0.31	57	35
	atpF-atpH	0.0-9.8%	0.053	1	8	3
	psbK-psbI	0.7-23.9%	0.177	1	9	3
	rpoB	0.6-8.9%	0.066	1	9	3
	rpoC1	0.0-16.1%	0.077	0.78	9	9
Potamogeton	rbcL	0.0-0.6%	0.001	0	50	22
	matK	0.0-3.5%	0.012	0.71	35	17
	trnH-psbA	0.0-2.6%	0.007	1	8	4
	trnL	0.0-4.5%	0.0034	0.18	91	39
	atpF-atpH	0.0-2.4%	0.014	0.67	6	6
	psbK-psbI	－	－	－	－	－
	rpoB	0.0-0.0%	0	0.2	6	5
	rpoC1	－	－	－	1	1
Ranunculus	rbcL	0.0-1.8%	0.003	0	148
	matK	0.0-7.0%	0.03	0.58	38	31
	trnH-psbA	0.0-14.2%	0.042	0.71	26	7
	trnL	0.0-9.6%	0.039	0.19	26	13
	atpF-atpH	0.0-10.3%	0.056	0.43	8	7
	psbK-psbI	－	－	－	1	1
	rpoB	0.0-0.7%	0.007	0.6	5	5
	rpoC1	0.0-5.0%	0.02	0.33	13	11
Rumex	rbcL	0.0-4.3%	0	0	98	26
	matK	0.0-5.4%	0.014	0.21	50	24
	trnH-psbA	0.0-1.0%	0.003	0.5	6	6
	trnL	0.0-8.8%	0.039	0.44	15	9
	atpF-atpH	1.9-7.1%	0.053	－	3	3
	psbK-psbI	－	－	－	－	－
	rpoB	0.0-3.8%	0.015	0.2	5	5
	rpoC1	0.0-4.4%	0.022	0.25	4	4
Trapa	rbcL	0.0-0.6%	0.003	0.17	7	5
	matK	－	－	－	1	1
	trnH-psbA	－	－	－	1	1
	trnL	0.0-7.3%	0.034	0.33	7	5
	atpF-atpH	－	－	－	－	－
	psbK-psbI	－	－	－	－	－
	rpoB	－	－	－	－	－
	rpoC1	－	－	－	－	－
Poaceae	rbcL	0.0-2.9%	0.012	0.45	41	33
	matK	0.0-12.0%	0.053	0.41	35	27
	trnH-psbA	0.0-6.1%	0.029	0.45	41	30
	trnL	0.0-13.3%	0.062	0.77	16	12
	atpF-atpH	0.0-3.9%	0.015	0.48	29	20
	psbK-psbI	0.0-13.3%	0.07	0.55	22	20
	rpoB	0.0-2.6%	0.005	0.29	10	7
	rpoC1	0.0-12.0%	0.053	0.44	12	9
