# Supplementary material for: Selection of a marker gene to construct a reference library for wetland plants, and the application of metabarcoding to analyze the diet of wintering herbivorous waterbirds
Source: PeerJ. 2016 Aug 17;4:e2345. doi: 10.7717/peerj.2345 (PMC4991844; doi:10.7717/peerj.2345)
Supplement: Table S2 — The resolvable power indicated the percentage of identified species. [file peerj-04-2345-s002.xlsx]

## Sheet: Sheet1
S2 Table. Plant taxa identified in the feces of greater white-fronted goose (GWFG) and bean goose (BG) in Shengjin Lake National Nature Reserve.
Family	Plants	Level of identification	GWFG faeces											Total	BG faeces										Total
			1	2	3	4	5	6	7	8	9	10	11		1	2	3	4	5	6	7	8	9	10
Caryophyllaceae	Stellaria media	Species								＊			＊	2											0
Asteraceae	Asteraceae sp.	Genus					＊	＊	＊			＊		4											0
Asteraceae	Lapsana apogonoldes	Species	＊		＊					＊				3											0
Cyperaceae	Carex spp. (except Carex heterolepis)	Genus	＊	＊	＊	＊	＊	＊	＊	＊	＊	＊		10	＊	＊	＊		＊	＊	＊	＊	＊	＊	9
Cyperaceae	Carex heterolepis	Species	＊	＊	＊	＊	＊	＊	＊	＊	＊	＊	＊	11	＊	＊	＊	＊	＊	＊	＊	＊	＊	＊	10
Poaceae	Poaceae spp. (except Poa annua)	Family	＊	＊	＊	＊	＊	＊	＊	＊	＊	＊	＊	11											0
Poaceae	Poa annua	Species		＊	＊	＊	＊	＊	＊	＊	＊	＊	＊	10	＊		＊	＊	＊	＊	＊	＊	＊	＊	9
Poaceae	Alopecurus aequalis	Species	＊	＊	＊	＊	＊	＊	＊	＊	＊	＊		10											0
Poaceae	Cynodon dactylon	Species		＊	＊	＊	＊			＊		＊	＊	7											0
Polygonaceae	Polygonum spp.	Genus	＊	＊	＊	＊	＊	＊	＊	＊	＊	＊	＊	11											0
Ranunculaceae	Ranunculus chinensis	Species	＊		＊			＊	＊					4											0
Rosaceae	Potentilla supina	Species	＊	＊	＊	＊	＊	＊	＊			＊		8	＊		＊	＊	＊	＊	＊	＊	＊	＊	9
Total number of plant items per fece			8	8	10	8	9	9	9	9	6	9	6		4	2	4	3	3	4	4	3	4	4
